# Supplementary material for: A microporous shp-topology metal–organic framework with an unprecedented high-nuclearity Co10-cluster for iodine capture and histidine detection
Source: Royal Society of Chemistry journal article supplement (doi:10.1039/d1qm00211b), 2021-01-01
Supplement: d1qm00211b1.pdf [file d1qm00211b1.pdf]

*Electronic Supplementary Information for*

A Microporous **shp**-Topology Metal–Organic Framework with an  
Unprecedented High-Nuclearity Co<sub>10</sub>-Cluster for Iodine Capture and  
Histidine Detection

Kun Wu,<sup>a</sup> Yong-Liang Huang,<sup>b</sup> Ji Zheng,<sup>a</sup> Dong Luo,<sup>a</sup> Mo Xie,<sup>a</sup> Yan Yan Li,<sup>a</sup> Weigang Lu<sup>\*a</sup> and Dan Li<sup>\*a</sup>

<sup>a</sup>College of Chemistry and Materials Science, and Guangdong Provincial Key Laboratory of Functional Supramolecular Coordination Materials and Applications, Jinan University, Guangzhou 510632, P. R. China E-mail: weiganglu@jnu.edu.cn; danli@jnu.edu.cn

<sup>b</sup>Department of Chemistry, Shantou University Medical College, Shantou 515041, P. R. China

**Contents**

**Section 1. Synthesis of JNU-201 and JNU-202**

**Section 2. Structural analysis**

**Section 3. Crystallographic data**

**Section 4. General characterizations**

**Section 5. Iodine adsorption**

**Section 6. Histidine detection**

## Section 1. Synthesis of JNU-201 and JNU-202

### Synthesis of JNU-201

A mixture of  $\text{Co}(\text{NO}_3)_2 \cdot 6\text{H}_2\text{O}$  (14.8 mg, 0.051 mmol),  $\text{H}_4\text{BTTB}$  (13.6 mg, 0.024 mmol), *N,N*-dimethylformamide (DMF, 2.0 mL), EtOH (1.0 mL),  $\text{H}_2\text{O}$  (1.0 mL),  $\text{CF}_3\text{COOH}$  (4  $\mu\text{L}$ ) and 4 mg imidazole was placed in a 10 mL glass vial and heated at 90 °C for 72 h. After it was cooled to room temperature at a rate of 5 °C  $\text{h}^{-1}$ , the pink block crystals were collected.

### Synthesis of JNU-202

A mixture of  $\text{Co}(\text{NO}_3)_2 \cdot 6\text{H}_2\text{O}$  (14.8 mg, 0.051 mmol),  $\text{H}_4\text{BTTB}$  (13.6 mg, 0.024 mmol), *N,N*-dimethylformamide (DMF, 2.0 mL), EtOH (1.0 mL),  $\text{H}_2\text{O}$  (1.0 mL) and  $\text{CF}_3\text{COOH}$  (20  $\mu\text{L}$ ) was placed in a 10 mL glass vial and heated at 90 °C for 72 h. After it was cooled to room temperature at a rate of 5 °C  $\text{h}^{-1}$ , the purple needle crystals were collected.

## Section 2. Structural analysis

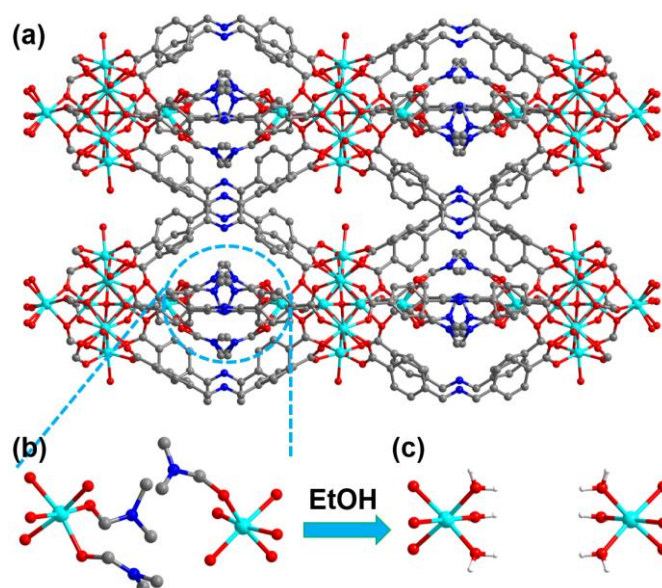

**Fig. S1.** The coordination mode between two adjacent clusters in JNU-200 before solvent exchange.

Analyzing the spatial position of the distribution of 10 Co atoms in the Co-O cluster, as shown in the Fig. S2b and S2c†, there are six Co atoms as the six vertices of the hexagon, the included angle formed by every three adjacent Co atoms is 119.64°, and the Co-Co distances of two adjacent Co atoms are 3.388 Å and 3.272 Å, respectively. In addition, the remaining four Co atoms are symmetrically distributed on the vertical line of the hexagon. The Co-Co distances of the four cobalt

atoms on the vertical line are 2.913 Å, 2.490 Å, and 2.913 Å, respectively.

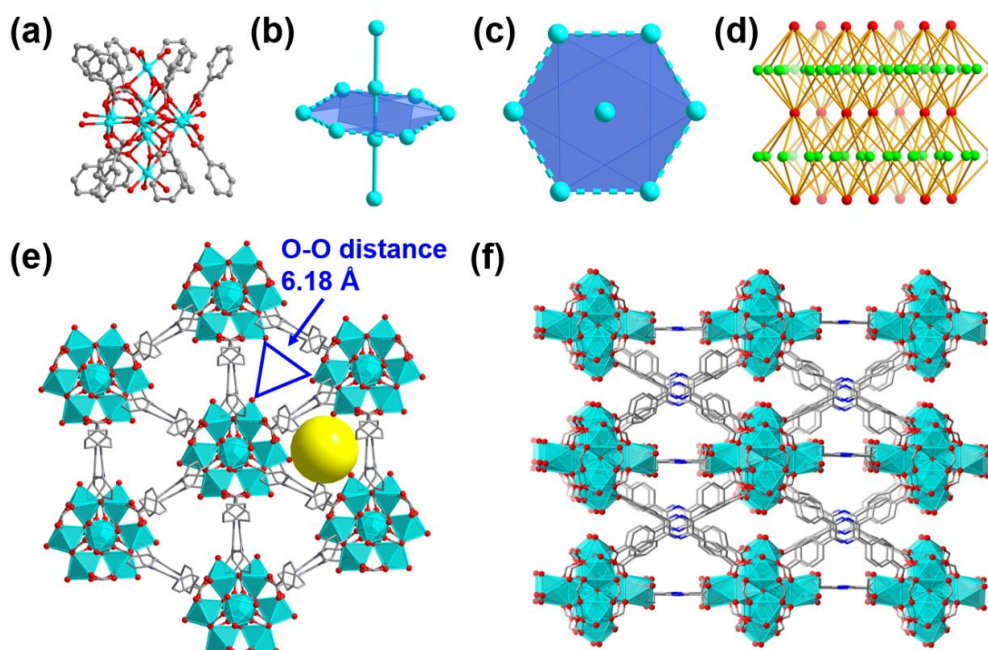

**Fig. S2.** (a) The coordination environment of  $[\text{Co}_{10}(\mu_4\text{-O})_3(\text{CO}_2)_{12}]$  SBUs. (b), (c) The relative position of Co atoms in a cobalt cluster. (d) Topological net for **JNU-200**. (e), (f) Ball-and-stick model of the **JNU-200** along  $a$  and  $c$  directions. (sky blue for Co, red for O, gray for C and blue for N, H atoms are not represented for the sake of clarity, yellow spheres highlight the triangular channels of **JNU-200**).

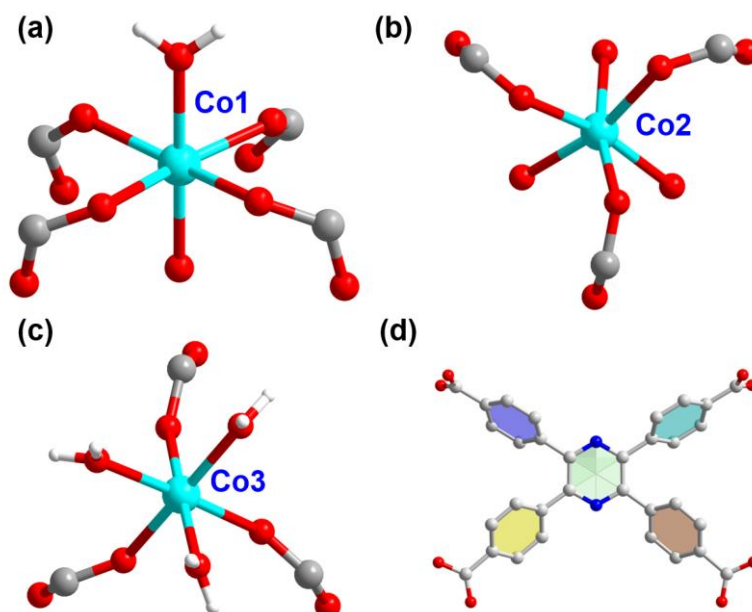

**Fig. S3.** Three different coordination modes of Co atom and organic ligand  $\text{BTTB}^{4-}$ . The  $\text{BTTB}^{4-}$  linker is distorted with dihedral angles between the phenyl plane and the pyrazinyl plane ( $40.67^\circ$ ,  $40.67^\circ$ ,  $56.85^\circ$ , and  $56.85^\circ$ ; sky blue for Co, red for O, gray for C and blue for N, H atoms are not represented for the sake of clarity.)

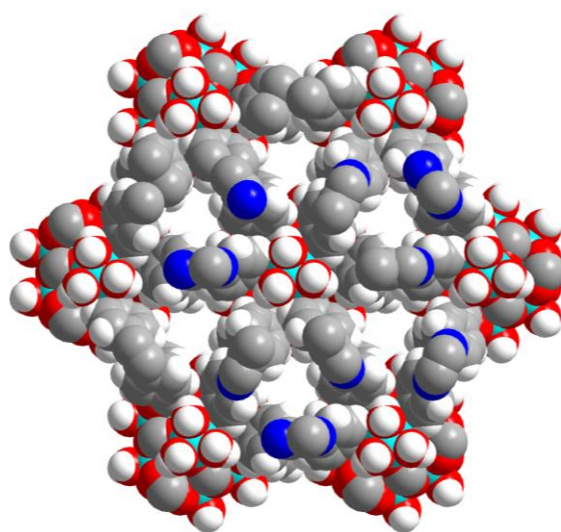

**Fig. S4.** Crystal structures of **JNU-200** in viewed along [001] direction in the space-filling model. (colour code: Co, turquoise; C, gray; N, blue; and O, red).

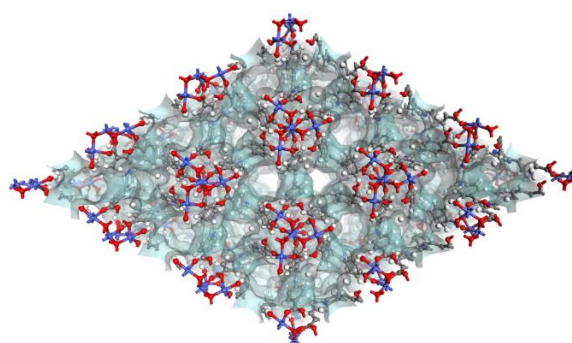

**Fig. S5.** Detailed inside view integrated with the Connolly surface (1D triangular channels (side length : 6.0 Å), Color coding: H, white; C, gray; N, light blue; O, red; Co, blue).

Single-crystal X-ray diffraction analysis shows that **JNU-201**  $((\text{Me}_2\text{NH}_2)_4 [\text{Co}_7(\mu_2\text{-O})_2 (\text{BTTB})_4 (\text{H}_2\text{O})_2 (\text{DMF})_4] (\text{H}_2\text{O})_4 (\text{DMF})_{10})$  crystallizes in the monoclinic crystal system with a space group of  $I2/m$ . The 8-connected  $\text{Co}_3(\mu_2\text{-O})_2(\text{H}_2\text{O})_2$  SBUs and  $\text{Co}_2(\mu_2\text{-O})(\text{H}_2\text{O})_3$  are extended by the 4-connected tetracarboxylate linkers into a 2D framework (Fig. S6). Single-crystal X-ray diffraction analysis shows that **JNU-202**  $(\text{Me}_2\text{NH}_2)_4 [\text{Co}_4(\mu_2\text{-O})_2 (\text{BTTB})_2 \text{H}_2\text{O} (\text{HCO}_2)_2(\text{DMF})_2] (\text{DMF})_4 (\text{H}_2\text{O})_4$  crystallizes in the monoclinic crystal system with a space group of  $P2/c$ . The 4-connected  $\text{Co}_2(\text{H}_2\text{O})_2\text{EtOH}$  SBUs are extended by the 4-connected tetracarboxylate linkers into a 3D framework (Fig. S7). Both **JNU-201** and **JNU-202** are constructed with low-nuclearity Co clusters. Therefore, the formation of high-nuclearity Co clusters could be hinged upon the pH of the reaction. It has been reported that pH is one of the factors affecting the formation of high-nuclearity clusters,<sup>1</sup> however, not in MOFs. The phase purity of bulk samples of **JNU-201** and **JNU-202** were confirmed

by comparison of their observed and simulated PXRD patterns (Fig. S8).

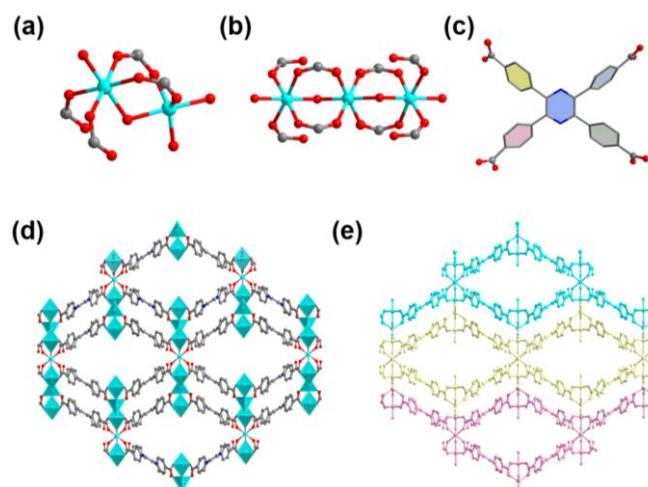

**Fig. S6.** (a) and (b) The Secondary building unit of **JNU-201**. (c) The configuration of the ligand in **JNU-201**. (d) Ball-and-stick model for **JNU-201** along *a* direction. (e) Two-dimensional layers stacking in **JNU-201**. The BTTB<sup>4+</sup> linker is distorted with dihedral angles between the phenyl plane and the pyrazinyl plane (44.44°, 45.48°, 51.32°, and 65.56°; sky blue for Co, red for O, gray for C and blue for N, H atoms are not represented for the sake of clarity.)

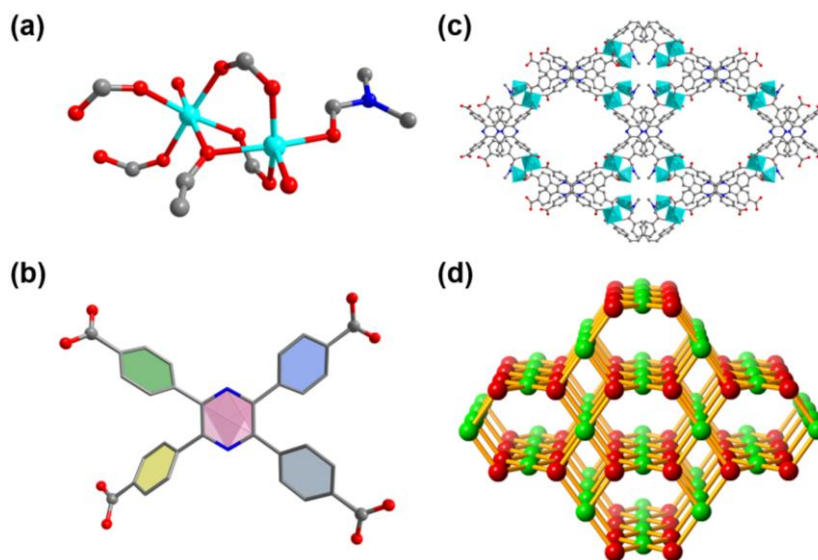

**Fig. S7.** (a) The Secondary building unit of **JNU-202**. (b) The configuration of the ligand in **JNU-202**. (c) Ball-and-stick model for **JNU-202** along *a* direction; The BTTB<sup>4+</sup> linker is distorted with dihedral angles between the phenyl plane and the pyrazinyl plane (34.66°, 34.66°, 52.07°, and 52.20°); (d) Topological net of **JNU-202** with **pts** topology. (sky blue for Co, red for O, gray for C, and blue for N, H atoms are not represented for the sake of clarity.)



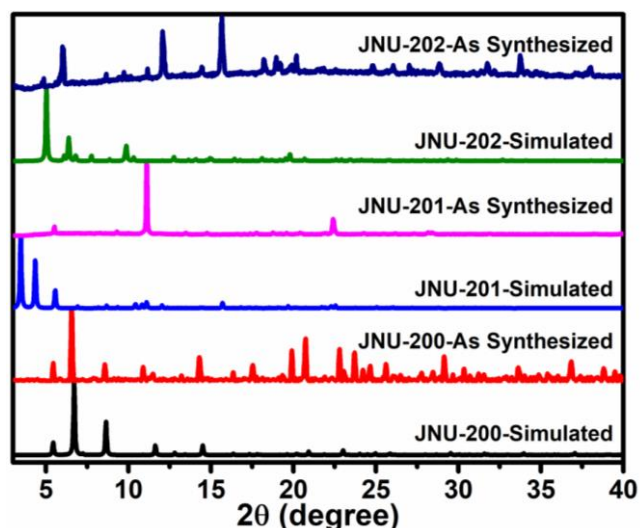

Fig. S8. PXRD patterns of JNU-200, JNU-201, and JNU-202.

### Determination of the Crystal Structures

Single-crystal X-ray diffraction data of **JNU-200** (as-synthesized), **JNU-200** (ethanol exchanged), **JNU-200'**, **JNU-200''**. **JNU-200** and **JNU-200'** were collected *via* an Oxford Cryo stream system on a XtaLAB PRO MM007-DW diffractometer system equipped with a RA-Micro7HF-MR-DW(Cu/Mo) X-ray generator and Pilatus3R-200K-A detector (Rigaku, Japan, Cu  $K\alpha$ ,  $\lambda = 1.54178$  Å) at 100(2) K. The numerical absorption corrections were applied using the program of ABSCOR. The structures were solved using direct methods, which yielded the positions of all non-hydrogen atoms, and they were refined anisotropically. Hydrogen atoms were placed in calculated positions with fixed isotropic thermal parameters and included in the structure factor calculations in the final stage of full-matrix least-squares refinement. All calculations were performed using the SHELXTL system of computer programs. The unit cell volume included a large region of disordered solvent which could not be modelled as discrete atomic sites. The treatment for the guest molecules in the cavities of all crystals involves the use of the SQUEEZE program of PLATON. Crystal data and structure refinement parameters are summarized in Tables S1. Topology information for the **JNU-200** was calculated by TOPOS 4.0.35.

### Section 3. Crystallographic data

**Table S1.** Crystal data and structure refinement for **JNU-200** (as-synthesized), **JNU-200** (ethanol exchanged), **JNU-200'** and **JNU-200''**.

| MOF                                                                             | JNU-200 (as-synthesized)                                                                   | JNU-200 (ethanol exchanged)                                                             | JNU-200'                                                                                          | JNU-200''                                                                                     |
|---------------------------------------------------------------------------------|--------------------------------------------------------------------------------------------|-----------------------------------------------------------------------------------------|---------------------------------------------------------------------------------------------------|-----------------------------------------------------------------------------------------------|
| CCDC number                                                                     | 2059809                                                                                    | 2059810                                                                                 | 2059811                                                                                           | 2059812                                                                                       |
| Empirical formula                                                               | C <sub>34.63</sub> H <sub>25.94</sub> Co <sub>2.67</sub> N <sub>2.88</sub> O <sub>12</sub> | C <sub>32.15</sub> H <sub>22</sub> Co <sub>2.64</sub> N <sub>2</sub> O <sub>12.13</sub> | C <sub>96</sub> H <sub>60</sub> Co <sub>10</sub> I <sub>7.13</sub> N <sub>6</sub> O <sub>33</sub> | C <sub>96</sub> H <sub>66</sub> Co <sub>9</sub> I <sub>3</sub> N <sub>6</sub> O <sub>36</sub> |
| Formula weight                                                                  | 831.86                                                                                     | 786.00                                                                                  | 3320.16                                                                                           | 2790.56                                                                                       |
| Crystal system                                                                  | hexagonal                                                                                  | hexagonal                                                                               | hexagonal                                                                                         | hexagonal                                                                                     |
| Space group                                                                     | <i>P</i> $\bar{6}$ 2 <i>c</i>                                                              | <i>P</i> $\bar{6}$ 2 <i>c</i>                                                           | <i>P</i> $\bar{6}$ 2 <i>c</i>                                                                     | <i>P</i> $\bar{6}$ 2 <i>c</i>                                                                 |
| a/ Å                                                                            | 15.20740(10)                                                                               | 15.0599(2)                                                                              | 15.3340(3)                                                                                        | 15.1495(4)                                                                                    |
| b/ Å                                                                            | 15.20740(10)                                                                               | 15.0599(2)                                                                              | 15.3340(3)                                                                                        | 15.1495(4)                                                                                    |
| c/ Å                                                                            | 32.4801(3)                                                                                 | 32.6709(5)                                                                              | 32.2756(8)                                                                                        | 32.4868(7)                                                                                    |
| V/ Å <sup>3</sup>                                                               | 6505.16(10)                                                                                | 6417.1(2)                                                                               | 6573.8(2)                                                                                         | 6457.1(3)                                                                                     |
| $\alpha$ /°                                                                     | 90                                                                                         | 90                                                                                      | 90                                                                                                | 90                                                                                            |
| $\beta$ /°                                                                      | 90                                                                                         | 90                                                                                      | 90                                                                                                | 90                                                                                            |
| $\gamma$ /°                                                                     | 120                                                                                        | 120                                                                                     | 120                                                                                               | 120                                                                                           |
| Z                                                                               | 6                                                                                          | 6                                                                                       | 2                                                                                                 | 2                                                                                             |
| D <sub>C</sub> /g cm <sup>-3</sup>                                              | 1.274                                                                                      | 1.220                                                                                   | 1.678                                                                                             | 1.435                                                                                         |
| $\mu$ /mm <sup>-1</sup>                                                         | 8.394                                                                                      | 8.404                                                                                   | 23.335                                                                                            | 15.033                                                                                        |
| $\lambda$ / Å                                                                   | 1.54184                                                                                    | 1.54184                                                                                 | 1.54184                                                                                           | 1.54184                                                                                       |
| T/ K                                                                            | 100                                                                                        | 100                                                                                     | 100                                                                                               | 100                                                                                           |
| Reflections collected                                                           | 21573                                                                                      | 28872                                                                                   | 24941                                                                                             | 20918                                                                                         |
| Independent reflections                                                         | 4001 [R <sub>int</sub> = 0.0839]                                                           | 4573 [R <sub>int</sub> = 0.0767]                                                        | 4282 [R <sub>int</sub> = 0.0529]                                                                  | 4395 [R <sub>int</sub> = 0.0639]                                                              |
| Goodness-of-fit on F <sup>2</sup>                                               | 1.094                                                                                      | 1.061                                                                                   | 1.096                                                                                             | 1.064                                                                                         |
| R <sub>1</sub> <sup>a</sup> , wR <sub>2</sub> <sup>b</sup> [I > 2 $\sigma$ (I)] | R <sub>1</sub> = 0.1009, wR <sub>2</sub> = 0.2769                                          | R <sub>1</sub> = 0.0960, wR <sub>2</sub> = 0.2616                                       | R <sub>1</sub> = 0.1293, wR <sub>2</sub> = 0.3275                                                 | R <sub>1</sub> = 0.1232, wR <sub>2</sub> = 0.2878                                             |
| R <sub>1</sub> <sup>a</sup> , wR <sub>2</sub> <sup>b</sup> (all data)           | R <sub>1</sub> = 0.1055, wR <sub>2</sub> = 0.2836                                          | R <sub>1</sub> = 0.1006, wR <sub>2</sub> = 0.2667                                       | R <sub>1</sub> = 0.1366, wR <sub>2</sub> = 0.3361                                                 | R <sub>1</sub> = 0.1362, wR <sub>2</sub> = 0.2975                                             |
| Largest diff. peak and hole /e.Å <sup>-3</sup>                                  | 1.44/-0.94                                                                                 | 1.96/-1.19                                                                              | 2.64/-1.67                                                                                        | 2.88/-1.29                                                                                    |

$$^a R_1 = \sum ||F_o| - |F_c|| / \sum |F_o|$$

$$^b wR_2 = \{ \sum [w (F_o^2 - F_c^2)^2] / [w (F_o^2)^2] \}^{1/2}, [F_o > 4\sigma (F_o)]$$

**Table S2.** Crystal data and structure refinement for **JNU-201** and **JNU-202**.

| MOF                                                                       | JNU-201                                                                                 | JNU-202                                                                        |
|---------------------------------------------------------------------------|-----------------------------------------------------------------------------------------|--------------------------------------------------------------------------------|
| CCDC number                                                               | 2059813                                                                                 | 2059814                                                                        |
| Empirical formula                                                         | C <sub>144</sub> H <sub>130.66</sub> C <sub>07</sub> N <sub>14</sub> O <sub>48.67</sub> | C <sub>74</sub> H <sub>62</sub> C <sub>04</sub> N <sub>7</sub> O <sub>25</sub> |
| Formula weight                                                            | 3248.43                                                                                 | 1685.02                                                                        |
| Crystal system                                                            | monoclinic                                                                              | monoclinic                                                                     |
| Space group                                                               | <i>I</i> 2/m                                                                            | <i>P</i> 2/c                                                                   |
| a/ Å                                                                      | 15.9042(2)                                                                              | 20.5687(3)                                                                     |
| b/ Å                                                                      | 22.8367(5)                                                                              | 25.5953(3)                                                                     |
| c/ Å                                                                      | 27.9925(5)                                                                              | 9.06771(10)                                                                    |
| α/°                                                                       | 90                                                                                      | 90                                                                             |
| β/°                                                                       | 97.024(2)                                                                               | 97.3041(11)                                                                    |
| γ/°                                                                       | 90                                                                                      | 90                                                                             |
| V/ Å <sup>3</sup>                                                         | 10090.6(3)                                                                              | 4735.08(10)                                                                    |
| Z                                                                         | 2                                                                                       | 2                                                                              |
| D <sub>C</sub> /g cm <sup>-3</sup>                                        | 1.069                                                                                   | 1.182                                                                          |
| μ /mm <sup>-1</sup>                                                       | 4.956                                                                                   | 5.960                                                                          |
| λ / Å                                                                     | 1.54184                                                                                 | 1.54184                                                                        |
| T/ K                                                                      | 100.01(15)                                                                              | 100.01(15)                                                                     |
| Reflections collected                                                     | 25393                                                                                   | 26223                                                                          |
| Independent reflections                                                   | 10314                                                                                   | 9608                                                                           |
| Goodness-of-fit on F <sup>2</sup>                                         | 1.027                                                                                   | 1.041                                                                          |
| R <sub>1</sub> <sup>a</sup> , wR <sub>2</sub> <sup>b</sup> [ I > 2σ (I) ] | R <sub>1</sub> = 0.1092, wR <sub>2</sub> = 0.2850                                       | R <sub>1</sub> = 0.0991, wR <sub>2</sub> = 0.2822                              |
| R <sub>1</sub> <sup>a</sup> , wR <sub>2</sub> <sup>b</sup> (all data)     | R <sub>1</sub> = 0.1127, wR <sub>2</sub> = 0.2879                                       | R <sub>1</sub> = 0.1083, wR <sub>2</sub> = 0.2947                              |
| Largest diff. peak and hole<br>/e.Å <sup>-3</sup>                         | 2.30/-0.93                                                                              | 1.71/-0.84                                                                     |

$$^a R_1 = \sum ||F_o| - |F_c|| / \sum |F_o|$$

$$^b wR_2 = \{ \sum [w (F_o^2 - F_c^2)^2] / [w (F_o^2)^2] \}^{1/2}, [F_o > 4\sigma (F_o)]$$



## Section 4. General characterizations

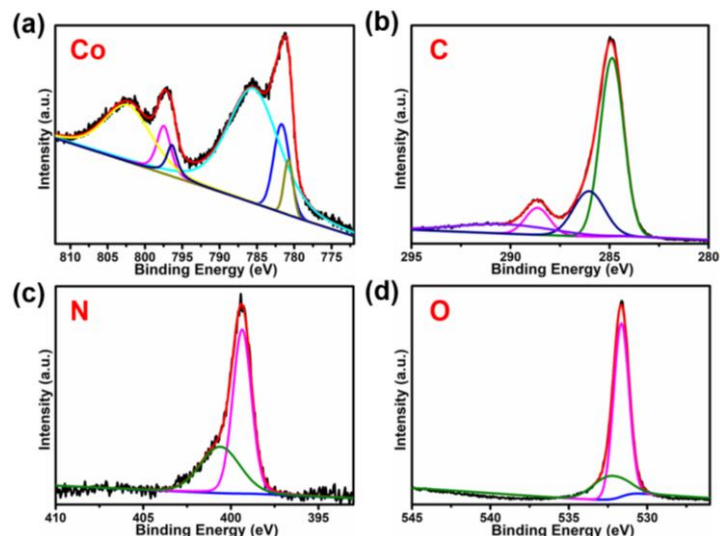

Fig. S9. High resolution XPS spectra of different elements in JNU-200.

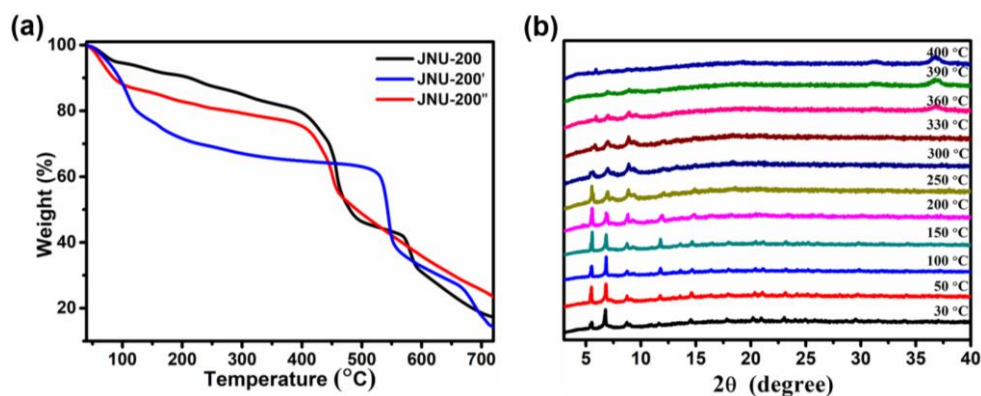

Fig. S10. (a) The TGA of JNU-200, JNU-200' and JNU-200''; (b) In-situ variable-temperature PXRD (VT-PXRD) patterns of JNU-200 under ambient conditions.

## Section 5. Iodine adsorption

The iodine adsorption capacity,  $Q$  (g/g), was calculated using equation (1)

$$Q = \frac{W_1 - W_0}{W_0} \quad (1)$$

where  $W_1$  and  $W_0$  are the weights of JNU-200 before and after iodine capture.<sup>2</sup>

The  $I_2$  adsorption efficiency (%) was obtained by the equation (2)

$$\text{Adsorption efficiency (\%)} = \left( \frac{C_0 - C_t}{C_0} \right) \times 100\% \quad (2)$$

where  $C_0$  and  $C_t$  (ppm) are the initial and time (t)  $I_2$  concentrations, respectively.

The adsorption amount at equilibrium ( $Q_e$ ) was obtained by equation (3)

$$Q_e = \left( \frac{C_0 - C_e}{m} \right) \times V \quad (3)$$

where  $Q_e$  ( $\text{mg g}^{-1}$ ) is the adsorbed amount at equilibrium;  $C_0$  and  $C_e$  (ppm) are the initial and equilibrium  $\text{I}_2$  concentrations;  $V$  (L) represents the volume of the  $\text{I}_2$  solution, and  $m$  (g) is the mass of the MOF.

The adsorbed amount was calculated by equation (4)

$$Q_t = \left( \frac{C_0 - C_t}{m} \right) \times V \quad (4)$$

where  $Q_t$  ( $\text{mg g}^{-1}$ ) is the adsorption capacity at time  $t$  (min);  $C_0$  is the initial concentration of  $\text{I}_2$ ,  $C_t$  (ppm) is the concentration of  $\text{I}_2$  at time  $t$ ,  $V$  (L) is the volume of the solution, and  $m$  (g) is the mass of the MOF.

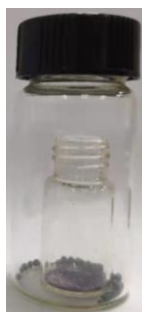

**Fig. S11.** The setup for iodine vapor adsorption.

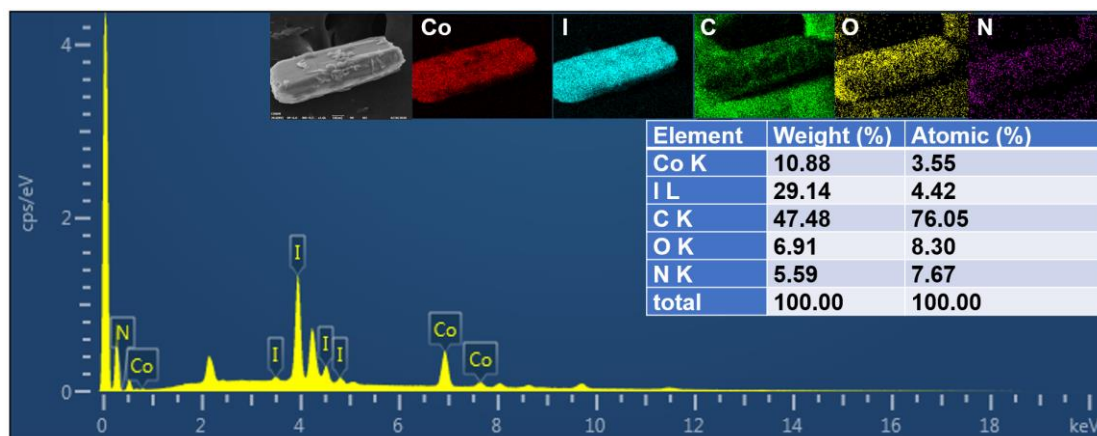

**Fig. S12.** SEM-EDS mapping and EDS spectra profiles of JNU-200 after iodine vapor adsorption.

**Table S3.** A summary of some representative materials for the iodine capture.

| MOFs    | CCDC number | $P$ calcg / $\text{cm}^3$ | BET $\text{m}^2/\text{g}$ | Iodine Uptake (g/g) | Iodine Uptake (wt.%) | Iodine Uptake $\text{g}/\text{cm}^3$ | Test conditions                        | Ref |
|---------|-------------|---------------------------|---------------------------|---------------------|----------------------|--------------------------------------|----------------------------------------|-----|
| MOF-808 | 1002672     | 0.955                     | 1930                      | 2.18                | 218                  | 2.08                                 | 80 $\square$ , $\text{I}_2$ (g)        | 2   |
| HKUST-1 | 112954      | 0.958                     | 1850                      | 1.75                | 175                  | 1.68                                 | 75 $^\circ\text{C}$ , $\text{I}_2$ (g) | 3   |
| NU-1000 | 1459134     | /                         | 2126                      | 1.45                | 145                  | /                                    | 80 $\square$ , $\text{I}_2$ (g)        | 2   |

|                                                                                                                                                        |         |       |        |       |       |       |                           |           |
|--------------------------------------------------------------------------------------------------------------------------------------------------------|---------|-------|--------|-------|-------|-------|---------------------------|-----------|
| MOF-808-imidazole                                                                                                                                      | /       | /     | 1379   | 1.34  | 134   | /     | 80 °C, I <sub>2</sub> (g) | 2         |
| ZIF-8                                                                                                                                                  | 602542  | 1.141 | 1630   | 1.25  | 125   | 1.43  | 77 I <sub>2</sub> (g)     | 4         |
| MFM-300(In)                                                                                                                                            | /       | /     | 1050   | 1.16  | 116   | /     | 80 °C, I <sub>2</sub> (g) | 5         |
| JNU-200                                                                                                                                                | 2059810 | 1.274 | 466    | 1.08  | 108   | 1.38  | 80 °C, I <sub>2</sub> (g) | This Work |
| Zn <sub>3</sub> (DL-lac) <sub>2</sub> (pybz) <sub>2</sub>                                                                                              | 745410  | 1.080 | 762.5  | 1     | 100   | 1.08  | R.T. I <sub>2</sub> (l)   | 6         |
| NU-1000-imidazole                                                                                                                                      | /       | /     | 1475   | 0.91  | 91    | /     | 80 °C, I <sub>2</sub> (g) | 2         |
| MOF-808-pyridine                                                                                                                                       | /       | /     | 1198   | 0.89  | 89    | /     | 80 °C, I <sub>2</sub> (g) | 2         |
| MOF-867                                                                                                                                                | 968930  | 0.756 | 2403   | 0.88  | 88    | 0.665 | 80 °C, I <sub>2</sub> (g) | 2         |
| NU-1000-pyridine                                                                                                                                       | /       | /     | 1386   | 0.71  | 71    | /     | 80 °C, I <sub>2</sub> (g) | 2         |
| AIOC-26-NC                                                                                                                                             | 2042202 | 1.049 | 508    | 0.71  | 70.1  | 0.745 | 80°C, I <sub>2</sub> (g)  | 7         |
| UiO-66                                                                                                                                                 | 733458  | /     | 1072   | 0.66  | 66    | /     | 80 °C, I <sub>2</sub> (g) | 2         |
| AIOC-28-NC                                                                                                                                             | 2042204 | 1.312 | /      | 0.621 | 62.1  | 0.815 | 80°C, I <sub>2</sub> (g)  | 7         |
| Micro-Cu <sub>4</sub> I <sub>4</sub> -MOF                                                                                                              | 1413643 | 1.297 | 641    | 0.13  | 12.5  | 0.169 | R.T. I <sub>2</sub> (g)   | 8         |
| {[(ZnI <sub>2</sub> ) <sub>3</sub> (-TPT) <sub>2</sub> ] <sub>2</sub> ·5.5(C <sub>6</sub> H <sub>5</sub> NO <sub>2</sub> ) <sub>2</sub> ] <sub>n</sub> | 187830  | 2.065 | /      | 0.59  | 37.2  | 1.22  | 80°C, I <sub>2</sub> (g)  | 9         |
| UiO-67                                                                                                                                                 | /       | /     | 2638   | 0.53  | 53    | /     | 80 °C, I <sub>2</sub> (g) | 2         |
| AIOC-27-NC                                                                                                                                             | 2042203 | 1.140 | 285    | 0.503 | 50.3  | 0.604 | 80°C, I <sub>2</sub> (g)  | 7         |
| Th-SINAP-8                                                                                                                                             | 1960537 | 1.251 | 650    | 0.473 | 47.3  | 0.592 | I <sub>2</sub> (l)        | 10        |
| SBMOF-2                                                                                                                                                | 1039469 | 1.192 | 195    | 0.427 | 42.7  | 0.509 | 25 °C, I <sub>2</sub> (g) | 11        |
| Th-SINAP-8                                                                                                                                             | 1960537 | 1.251 | 650    | 0.325 | 32.55 | 0.407 | I <sub>2</sub> (g)        | 10        |
| {[Co <sub>3</sub> (BTC) <sub>2</sub> (TIB) <sub>2</sub> (H <sub>2</sub> O) <sub>2</sub> ] <sub>2</sub> ·(H <sub>2</sub> O) <sub>6</sub> ] <sub>n</sub> | 977332  | 1.620 | /      | 0.279 | 27.9  | 0.452 | 80°C, I <sub>2</sub> (g)  | 12        |
| Th-SINAP-7                                                                                                                                             | 1960536 | 1.818 | 426    | 0.258 | 25.8  | 0.469 | I <sub>2</sub> (l)        | 10        |
| JNU-200                                                                                                                                                | 2059810 | 1.274 | 446    | 0.256 | 25.6  | 0.326 | I <sub>2</sub> (l)        | This Work |
| SBMOF-1                                                                                                                                                | 891520  | 1.624 | 145.15 | 0.226 | 22.6  | 0.367 | 25 °C, I <sub>2</sub> (g) | 11        |
| Th-SINAP-7                                                                                                                                             | 1960536 | 1.818 | 426    | 0.107 | 10.7  | 0.195 | I <sub>2</sub> (g)        | 10        |
| Zn-BTC                                                                                                                                                 | 1962948 | 0.987 |        | 0.2   | 20    | 0.197 | I <sub>2</sub> (g)        | 13        |

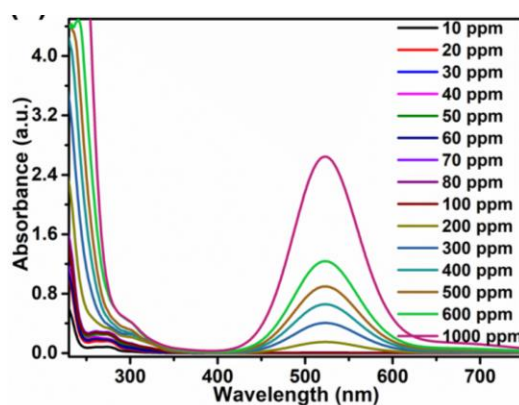

**Fig. S13.** UV-visible absorption spectra of hexane solutions (4 mL) of iodine at different concentrations after the addition of 4 mg JNU-200 for 24 h.

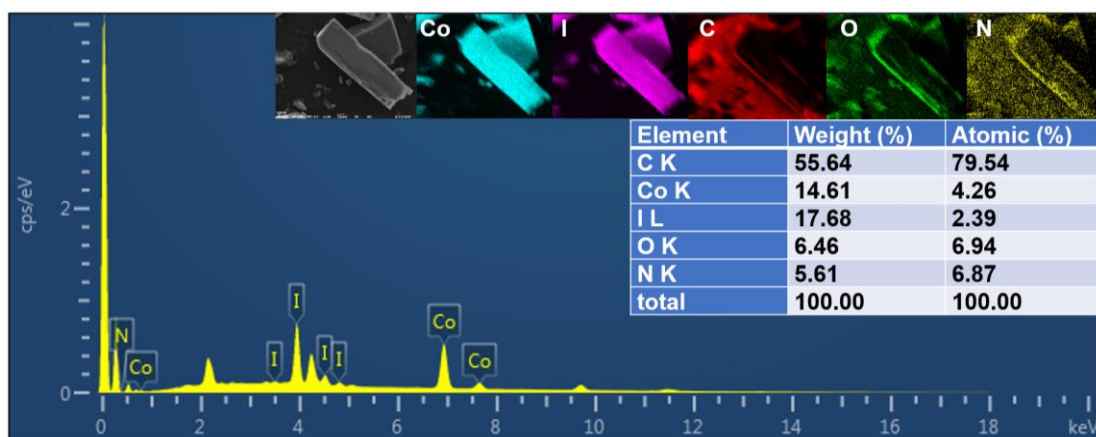

**Fig. S14.** SEM-EDS mapping and EDS spectra profiles of JNU-200 after iodine absorption from a hexane solution.

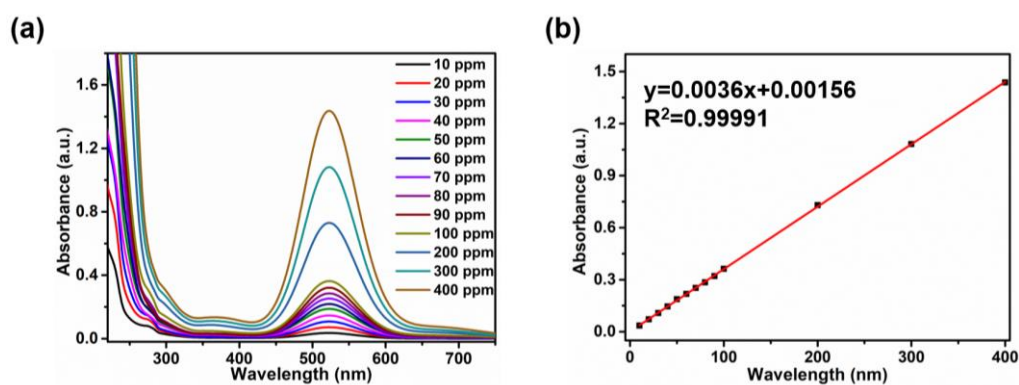

**Fig. S15.** UV-Vis absorption standard curve for iodine in hexane solution.

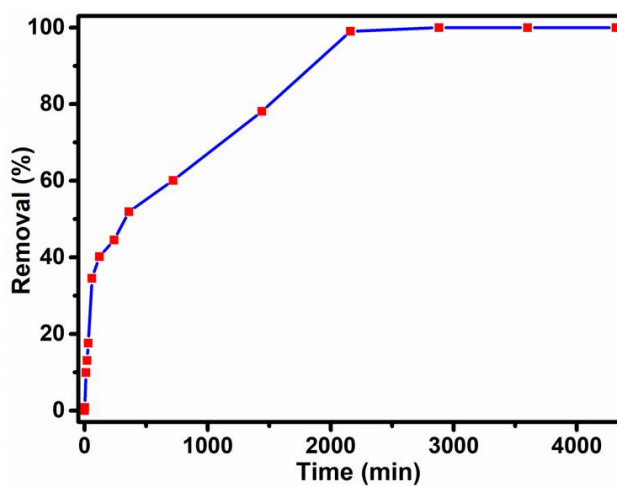

**Fig. S16.** Iodine adsorption kinetics of JNU-200 in hexane solutions.

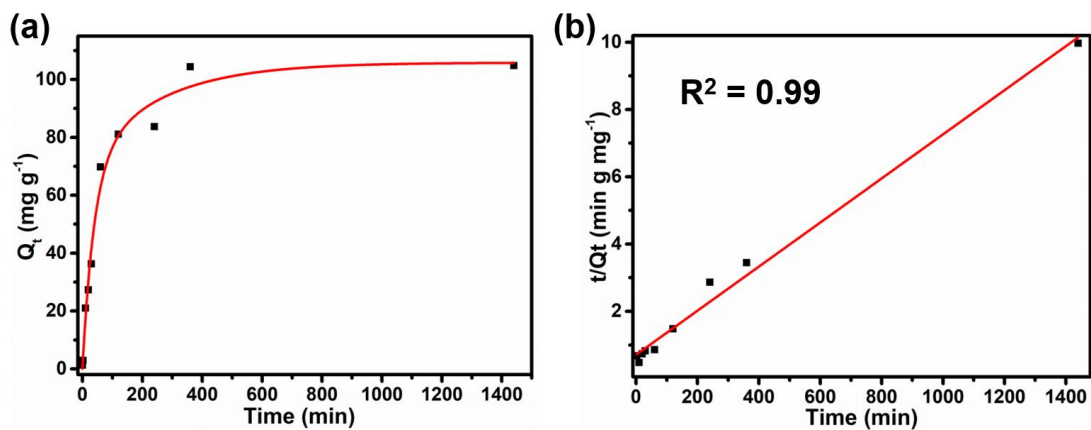

Fig. S17. (a) The change curve of  $Q_t$  with time; (b) Kinetic adsorption curves of the pseudo-second-order model for iodine adsorption of JNU-200 in hexane solution.

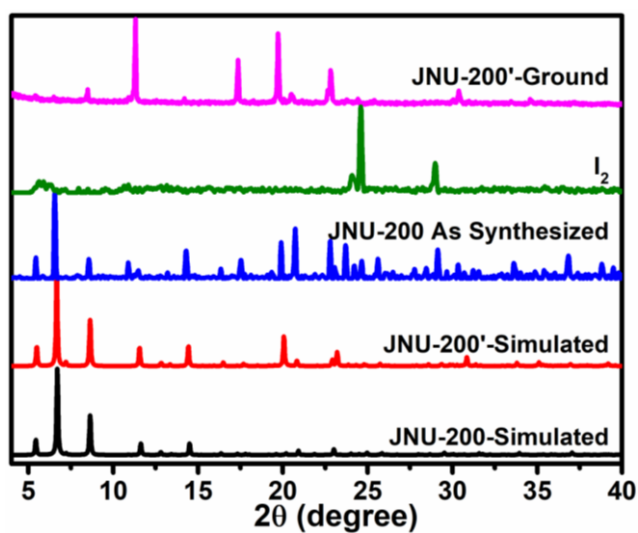

Fig. S18. PXRD patterns of JNU-200 before and after iodine vapor adsorption.

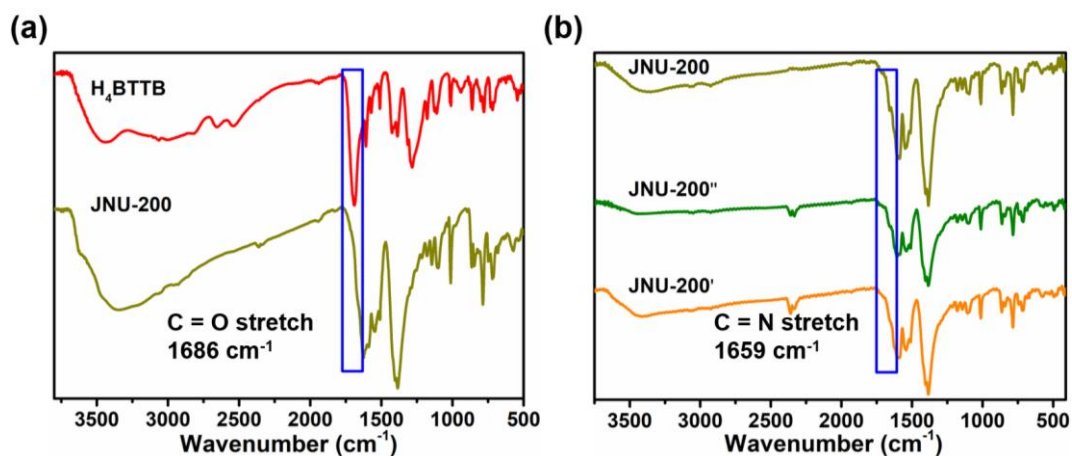

Fig. S19. FT-IR spectra of (a)  $H_4BTTB$ , JNU-200 and (b) JNU-200, JNU-200'', JNU-200'.

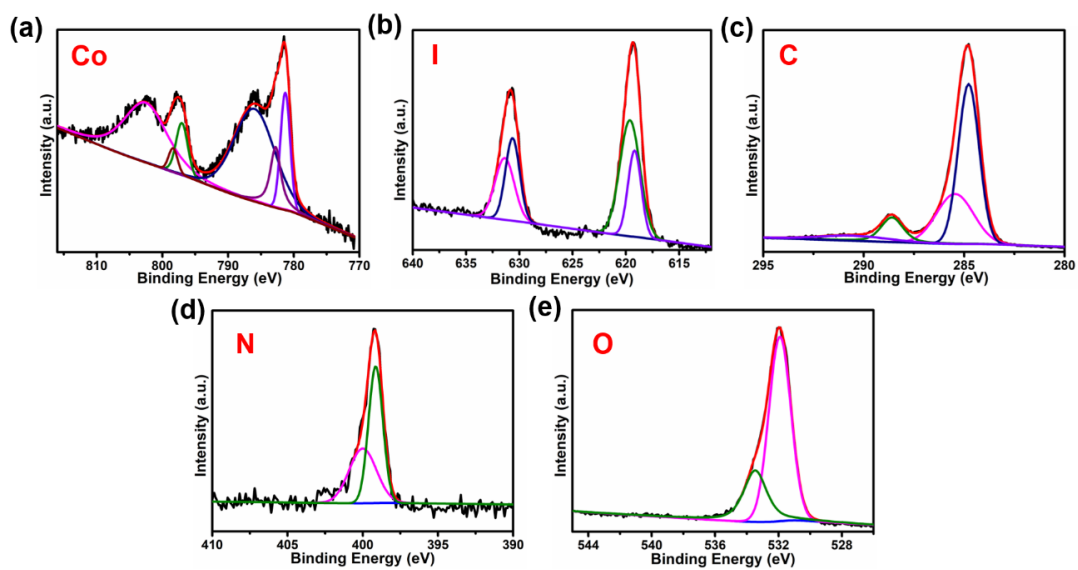

Fig. S20. High-resolution XPS spectra of different elements in JNU-200'.

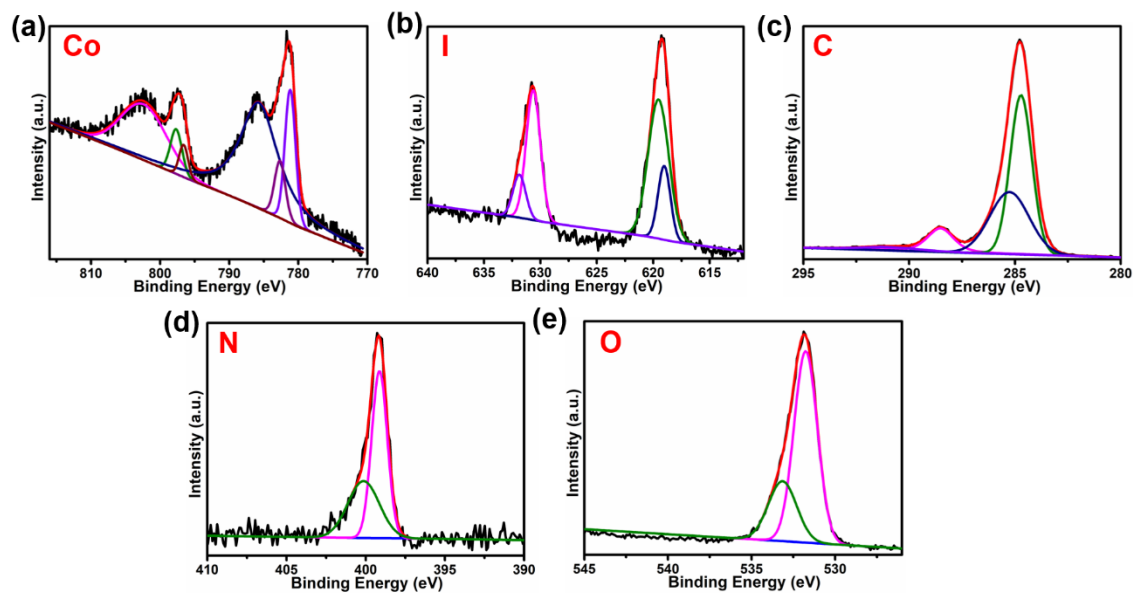

Fig. S21. High-resolution XPS spectra of different elements in JNU-200''.

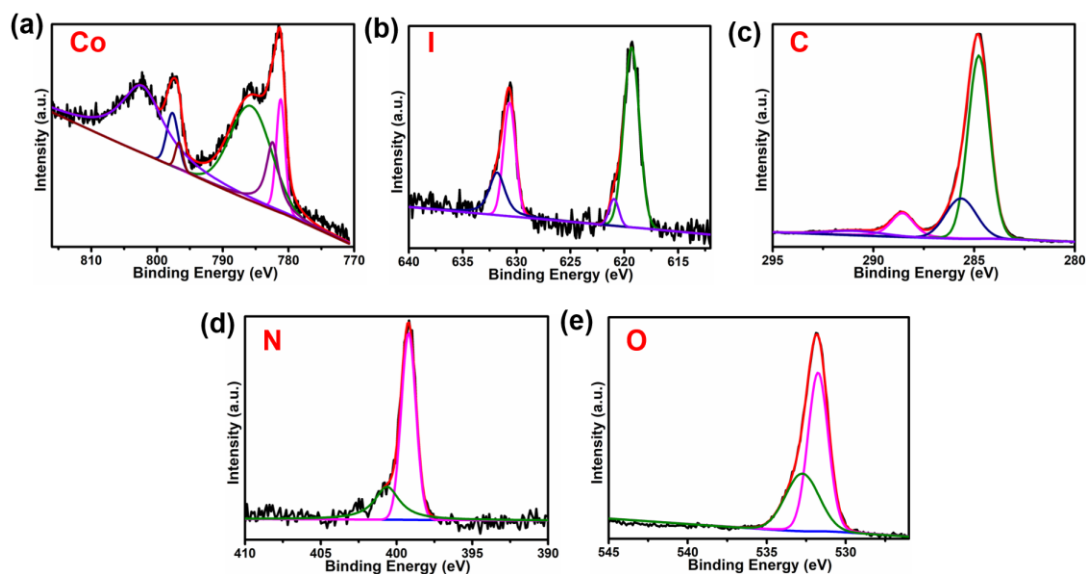

Fig. S22. High-resolution XPS spectra of different elements in JNU-200'-EtOH.

Table S4. XPS data for JNU-200, JNU-200', JNU-200'' and JNU-200'-EtOH.

|                                                    | JNU-200                                             | JNU-200'                                             | JNU-200''                                          | JNU-200'-EtOH                                      |
|----------------------------------------------------|-----------------------------------------------------|------------------------------------------------------|----------------------------------------------------|----------------------------------------------------|
| <b>Co</b>                                          | 802.29, 797.47<br>796.39, 785.46<br>781.68, 780.76, | 802.55, 798.36,<br>797.04, 785.99,<br>782.77, 781.29 | 802.38, 797.68<br>796.60, 785.69<br>782.66, 781.17 | 802.28, 797.65<br>796.65, 785.71<br>782.42, 781.18 |
| <b>I</b>                                           | /                                                   | 630.63, 619.63,<br>619.18, 631.37                    | 630.63, 619.54,<br>619.03, 631.85                  | 630.65, 620.95,<br>619.33, 631.81                  |
| <b>C</b>                                           | 290.28, 288.64,<br>284.88, 286.04                   | 290.49, 288.59<br>284.78, 285.45                     | 290.93, 288.52,<br>284.72, 285.26                  | 290.90, 288.56<br>284.77, 285.66                   |
| <b>N</b>                                           | 399.36, 400.61                                      | 399.14, 400.00                                       | 399.13, 400.13                                     | 399.21, 400.63                                     |
| <b>O</b>                                           | 531.65, 532.37                                      | 531.91, 533.47                                       | 531.75, 533.15                                     | 531.75, 532.74                                     |
| <b>Co<sup>3+</sup>/Co<sup>2+</sup><sup>a</sup></b> | 0.4325                                              | 1.5885                                               | 0.6816                                             | 0.64                                               |

<sup>a</sup> According to Co(III) 2p<sub>3/2</sub> and Co(II) 2p<sub>3/2</sub> peak areas.



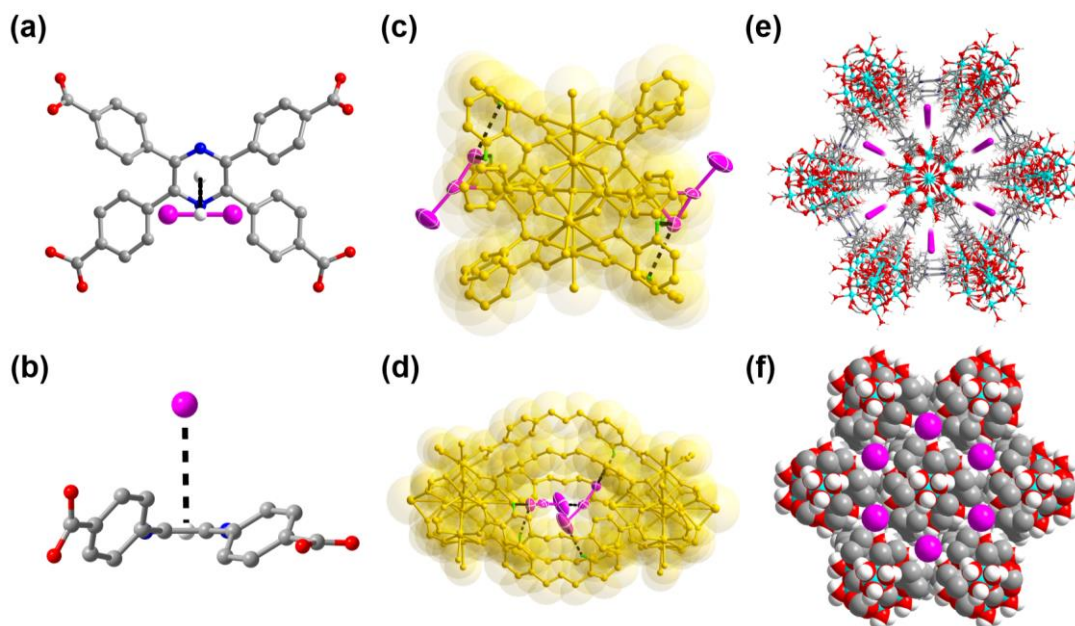

**Fig. S23.** Supramolecular interactions between iodine and framework (a) and (b) the distance between iodine and BTBT in the channel is 4.28 Å ( $I \cdots \pi$  supramolecular interactions, dashed black line; white, dummy atom), (c) and (d) the  $I_3^-$  connected on the Co-O cluster, where the distance of  $C-H \cdots I$  are 2.62 Å, 3.23 Å and 3.30 Å (dashed black lines), respectively; Crystal structures of **JNU-200** in viewed along [001] direction in the (e) ball-and-stick and (f) space-filling model; sky blue for Co, red for O, gray for C, and blue for N.

## Section 6. Histidine detection

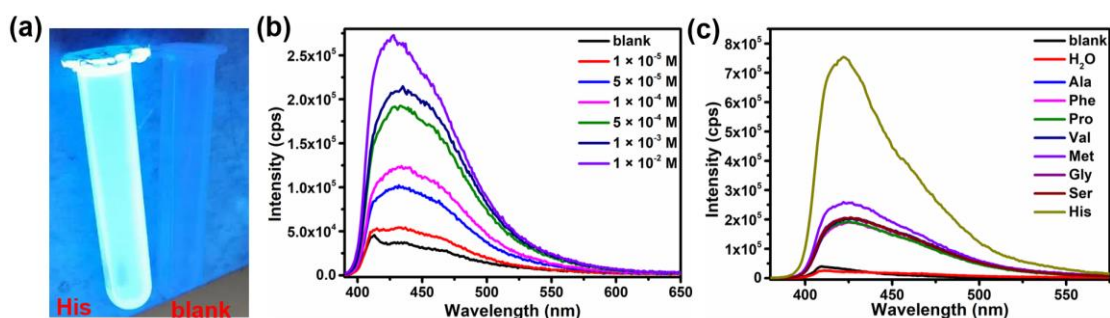

**Fig. S24.** (a) **JNU-200** suspension excited at 365 nm with or without His; (b) Concentration-dependent emission spectra of THF/H<sub>2</sub>O suspensions of **JNU-200** (4 mg/100 mL) upon incremental addition of His under 365 nm excitation. (c) Luminescence emission spectra of THF/H<sub>2</sub>O suspensions of **JNU-200** (4 mg/100 mL) in the presence of different amino acids (1.0 mM) under 365 nm excitation.

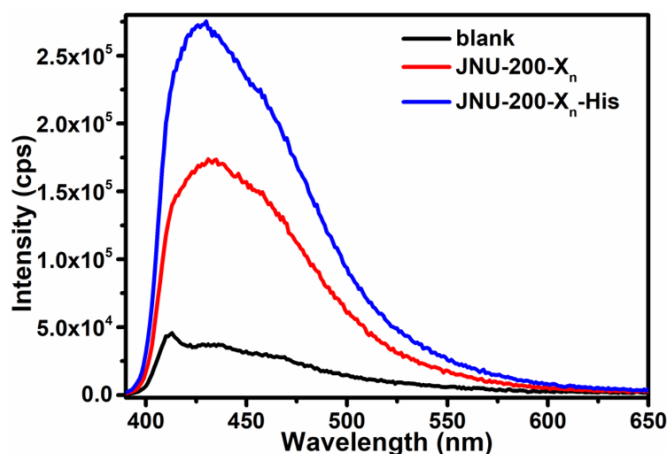

**Fig. S25.** Luminescence spectra of JNU-200 suspensions upon the addition of His in the presence of seven amino acids (X = Ala, Phe, Pro, Val, Met, Gly, and Ser, 0.1 mM for each amino acid) under 365 nm excitation.

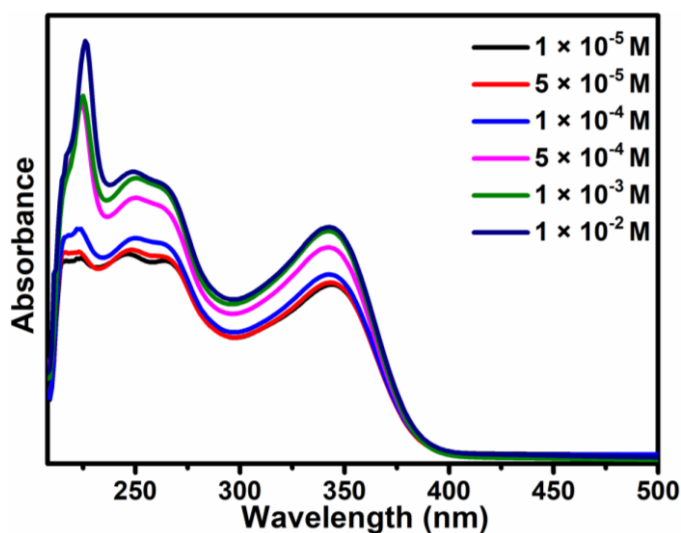

**Fig. S26.** Concentration-dependent UV-Visible absorption spectra of THF/H<sub>2</sub>O suspensions of JNU-200 at different concentrations under 365-nm excitation.

1. G. E. Kostakis, S. P. Perlepes, V. A. Blatov, D. M. Proserpio and A. K. Powell, *Coord. Chem. Rev.*, 2012, **256**, 1246-1278.
2. P. Chen, X. H. He, M. B. Pang, X. T. Dong, S. Zhao and W. Zhang, *ACS Appl. Mater. Interfaces*, 2020, **12**, 20429-20439.
3. D. F. Sava, K. W. Chapman, M. A. Rodriguez, J. A. Greathouse, P. S. Crozier, H. Zhao, P. J. Chupas and T. M. Nenoff, *Chem. Mater.*, 2013, **25**, 2591-2596.
4. D. F. Sava, M. A. Rodriguez, K. W. Chapman, P. J. Chupas, J. A. Greathouse, P. S. Crozier and T. M. Nenoff, *J. Am. Chem. Soc.*, 2011, **133**, 12398-12401.
5. X. Zhang, I. da Silva, H. G. W. Godfrey, S. K. Callear, S. A. Sapchenko, Y. Cheng, I. Vitorica-Yrezabal, M. D. Frogley, G. Cinque, C. C. Tang, C. Giacobbe, C. Dejoie, S. Rudic, A. J. Ramirez-Cuesta, M. A. Denecke, S. Yang and M. Schroder, *J. Am. Chem. Soc.*, 2017, **139**, 16289-16296.
6. Z. M. H, Q. X. Wang, Y. X. Tan, S. Hu, H. X. Zhao, L. S. Long and M. Kurmoo, *J. Am. Chem.*

- Soc.*, 2010, **132**, 2561–2563
7. S. Yao, W. H. Fang, Y. Sun, S. T. Wang and J. Zhang, *J. Am. Chem. Soc.*, 2021, DOI: 10.1021/jacs.0c11778.
  8. N. X. Zhu, C. W. Zhao, J. C. Wang, Y. A. Li and Y. B. Dong, *Chem Commun (Camb)*, 2016, **52**, 12702-12705.
  9. G. Brunet, D. A. Safin, M. Z. Aghaji, K. Robeyns, I. Korobkov, T. K. Woo and M. Murugesu, *Chem. Sci.*, 2017, **8**, 3171-3177.
  10. Z. J. Li, Z. H. Yue, Y. Ju, X. L. Wu, Y. M. Ren, S. F. Wang, Y. X. Li, Z. H. Zhang, X. F. Guo, J. Lin and J. A. Wang, *Inorg. Chem.*, 2020, **59**, 4435-4442.
  11. D. Banerjee, X. Chen, S. S. Lobanov, A. M. Plonka, X. Chan, J. A. Daly, T. Kim, P. K. Thallapally and J. B. Parise, *ACS Appl. Mater. Interfaces*, 2018, **10**, 10622-10626.
  12. Y. Rachuri, K. K. Bisht and E. Suresh, *Cryst. Growth Des.*, 2014, **14**, 3300-3308.
  13. A. Sarkar, A. Adhikary, A. Mandal, T. Chakraborty and D. Das, *Cryst. Growth Des.*, 2020, **20**, 7833-7839.
